# Supplementary material for: Synthesis, characterization and antitumor properties of two highly cytotoxic ruthenium(iii) complexes with bulky triazolopyrimidine ligands
Source: Royal Society of Chemistry journal article supplement (doi:10.1039/c2dt32216a), 2012-12-17
Supplement: c2dt32216a.pdf [file c2dt32216a.pdf]

# Synthesis, characterization and antitumor properties of two highly cytotoxic ruthenium(III) complexes with bulky triazolopyrimidine ligands

Iwona Łakomska<sup>Error! Bookmark not defined.\*</sup>, Marzena Fandzloch,<sup>a</sup> Tadeusz Muzioł,<sup>Error! Bookmark not defined.</sup> Tadeusz Lis,<sup>1</sup> Julia Jezierska,<sup>1</sup>

## List of contents in the ESI:

1. **Figure S1.** Packing of **1**.
2. **Figure S2.** Packing of **2** with omitted hydrogen atoms and acetone molecule occurring only in one orientation (alternate structure was omitted for the clarity of the picture) along c axis reveals bc layers.
3. **Figure 3S.** The EPR spectra, (1) and (2), of powdered **1** and **2** complexes, respectively, and (2 ac) of the acetone solution of **2**, measured a) at X-band (9.581GHz) and b) at Q-band (33.98 GHz) and at 77 K, together with computer simulated spectra (sim **1** and sim **2**, respectively) using the spin Hamiltonian parameters given in the text.
4. **Figure 4S.** Cyclic voltammograms of  $10^3$  M solutions of complex **1** in DMF (Fig. 4a) ( $E_p^{ox} = -0.36$  V and  $E_p^{red} = -0.29$  V), and complex **2** in DMF (Fig. 4b) ( $E_p^{ox} = -0.36$  V and  $E_p^{red} = -0.27$  V) with 0.1 M [nBu<sub>4</sub>N](PF<sub>6</sub>) at a scan rate of 0.1 V s<sup>-1</sup>.
5. **Table 1S.** Comparison of X-X distances and X-M-X angles in the studied octahedral ruthenium complexes containing halogen atoms and triazolopyrimidine as ligands.

---

<sup>1</sup> Faculty of Chemistry, Wrocław University, F. Joliot-Curie 14, 50-383 Wrocław, Poland

\*corresponding author

† Electronic supplementary information (ESI) available: CIF files and crystals packing of both ruthenium(III) compounds 1,2; CV and EPR spectra; comparison of X-X distances and X-M-X angles in the studied octahedral ruthenium complexes. CCDC 787821 1 and 901853 2. For ESI and crystallographic data in CIF or other electronic format see DOI: 10.1039/c2dt32216a.

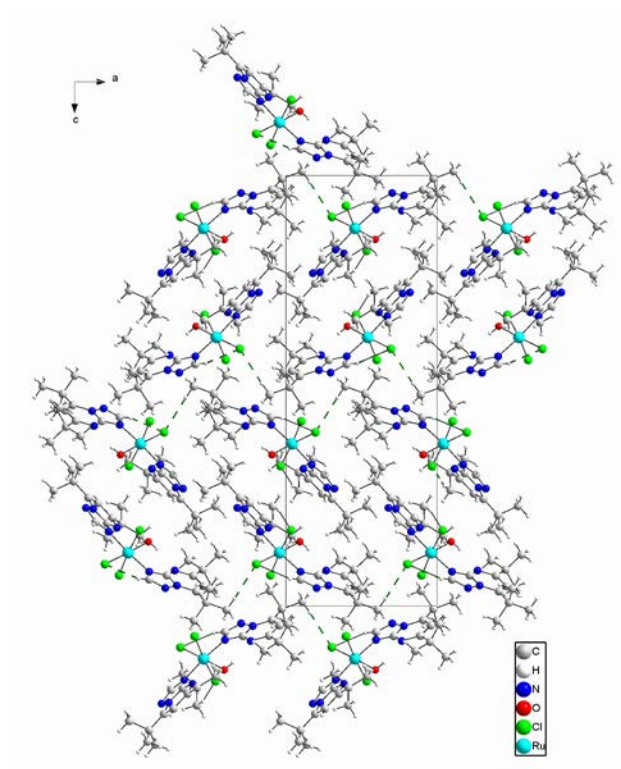

**Figure S1.** Packing of **1**.

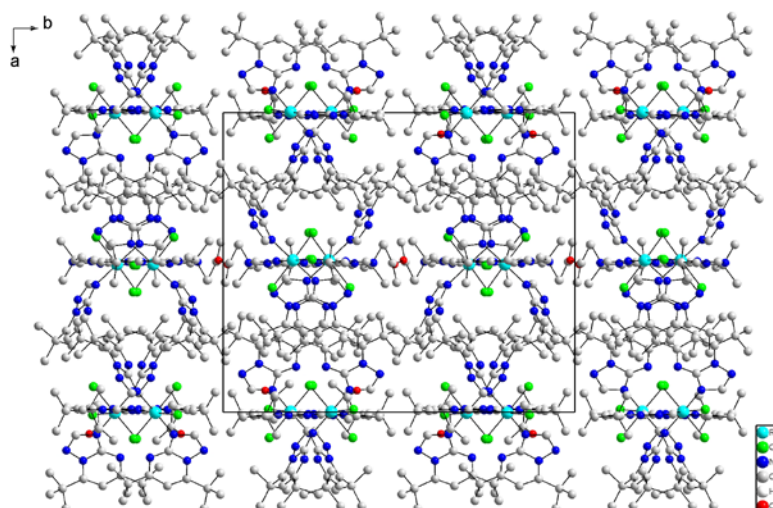

**Figure S2.** Packing of **2** with omitted hydrogen atoms and acetone molecule occurring only in one orientation (alternate structure was omitted for the clarity of the picture) along *c* axis reveals *bc* layers.

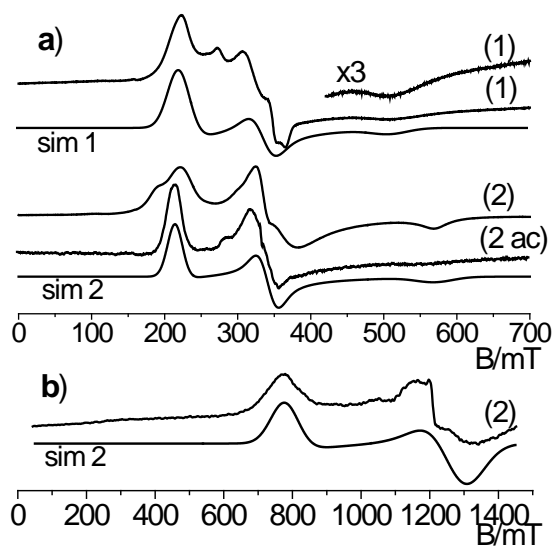

**Figure 3S.** The EPR spectra, (1) and (2), of powdered **1** and **2** complexes, respectively, and (2 ac) of the acetone solution of **2**, measured a) at X-band (9.581GHz) and b) at Q-band (33.98 GHz) and at 77 K, together with computer simulated spectra (sim **1** and sim **2**, respectively) using the spin Hamiltonian parameters given in the text.

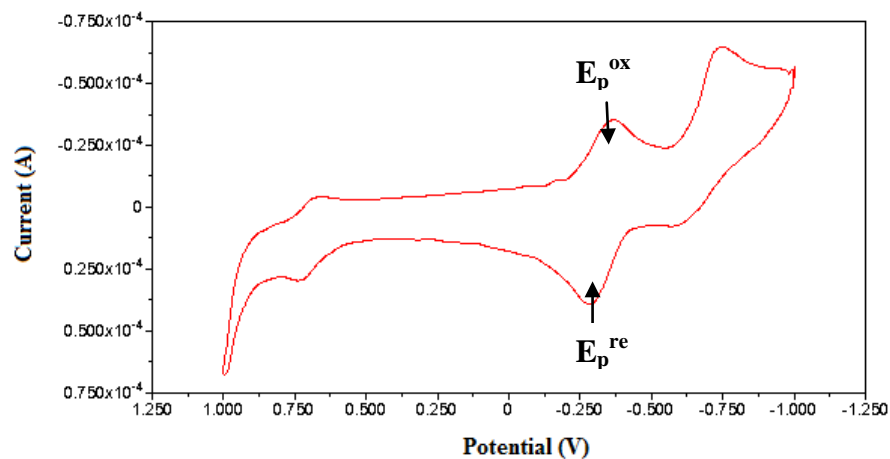

**Fig. 4a**

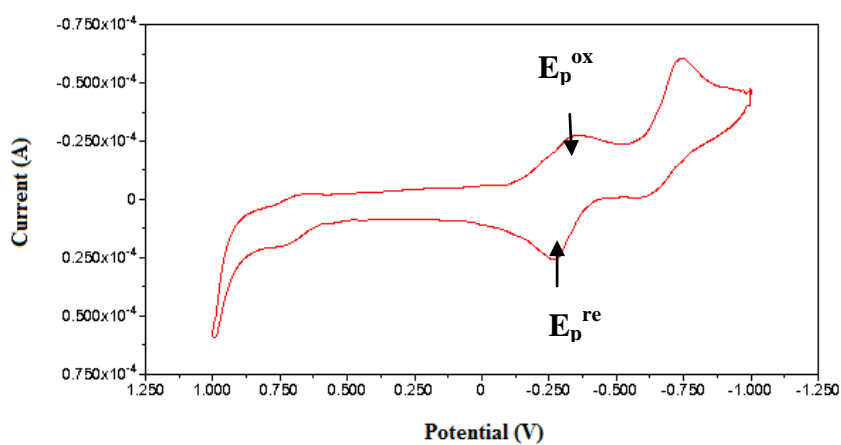

**Fig. 4b**

**Figure 4S.** Cyclic voltammograms of  $10^{-3}$  M DMF solutions of complex **1** (**Fig. 3a**) ( $E_p^{ox} = -0.36$  V and  $E_p^{red} = -0.29$  V), and complex **2** (**Fig. 3b**) ( $E_p^{ox} = -0.36$  V and  $E_p^{red} = -0.27$  V) in 0.1 M  $[nBu_4N](PF_6)$  at a scan rate of  $0.1 \text{ Vs}^{-1}$ .

**Table 1S.** Comparison of X-X distance and X-M-X angle in selected octahedral ruthenium complexes with halogen atoms and triazolopyrimidine as ligands.

| Compound                                                                                                 | M-N [Å]     | M-X [Å]     | X-X [Å] | X-M-X [°] | REF.       |
|----------------------------------------------------------------------------------------------------------|-------------|-------------|---------|-----------|------------|
| <i>trans</i> -[RuCl <sub>3</sub> (H <sub>2</sub> O)(dbtp) <sub>2</sub> ]                                 | 2.074       | and 2.3118, | 3.323,  | 91.74,    | This paper |
|                                                                                                          | 2.075       | 2.3182,     | 3.348,  | 92.33     |            |
|                                                                                                          |             | 2.3291      | 4.644   | 175.36    |            |
| <i>mer</i> -[RuCl <sub>3</sub> (dbtp) <sub>3</sub> ].0.829OCMe <sub>2</sub>                              | 2.050,      | 2.350,      | 3.340,  | 89.97,    | This paper |
|                                                                                                          | 2.067,      | 2.3520,     | 3.342,  | 90.00,    |            |
|                                                                                                          | 2.076,      | 2.3551,     | 3.375,  | 91.10,    |            |
|                                                                                                          | 2.085,      | 2.363,      | 3.390,  | 91.98,    |            |
|                                                                                                          | 2.093,      | 2.364,      | 4.707,  | 177.99,   |            |
|                                                                                                          | 2.094       | 2.3723      | 4.713   | 178.52,   |            |
| <i>trans</i> -[RuCl <sub>3</sub> (dmtp) <sub>2</sub> (9-methyladenine)].½CH <sub>2</sub> Cl <sub>2</sub> | 2.035 (adn) | 2.333,      | 3.364,  | 89.89,    | 9          |
|                                                                                                          | 2.090       | and 2.377,  | 3.366,  | 91.03,    |            |
|                                                                                                          | 2.083       | 2.385       | 4.710,  | 178.64    |            |
| <i>trans</i> -[RuCl <sub>3</sub> (H <sub>2</sub> O)(dmtp) <sub>2</sub> ]                                 | 2.092(4)    | 2.306(2)    | 3.331   | 91.8(1)   | 5a         |
|                                                                                                          | 2.092(4)    | 2.331(2)    | 3.342   | 90.1(1)   |            |
|                                                                                                          | 2.101(4)    | 2.388(2)    | 4.693   | 178.0(2)  |            |
|                                                                                                          | (Ru1-O1)*   |             |         |           |            |
| <i>mer</i> -[RuCl <sub>3</sub> (H <sub>2</sub> O)(dmsO)(dmtp)].H <sub>2</sub> O                          | 2.137(2)    | 2.313(1)    | 3.360   | 94.22     | 4          |
|                                                                                                          | 2.267(1)    | 2.332(1)    | 3.407   | 92.66     |            |
|                                                                                                          | (Ru1-S1)    | 2.337(1)    | 4.659   | 172.77    |            |
|                                                                                                          | 2.094(2)    |             |         |           |            |
| (Hdmtp) <i>trans</i> -[RuCl <sub>4</sub> (dmsO)(dmtp)].¼Et <sub>2</sub> O                                | (Ru1-O2)    |             |         |           | 4          |
|                                                                                                          | 2.121(8)    | 2.329(2)    | 3.442   | 94.73     |            |
|                                                                                                          | 2.255(2)    | 2.346(3)    | 3.262   | 87.62     |            |
|                                                                                                          | (Ru1-S1)    | 2.349(2)    | 3.295   | 89.62     |            |
|                                                                                                          |             | 2.364(3)    | 3.273   | 88.04     |            |
|                                                                                                          |             |             | 4.691   | 175.22    |            |
|                                                                                                          |             | 4.692       | 177.63  |           |            |
